# Supplementary material for: Case report: Artificial thymic organoids facilitate clinical decisions for a patient with a TP63 variant and severe persistent T cell lymphopenia
Source: PubMed Central journal article supplement (PMC11448704; doi:10.3389/fimmu.2024.1438383), 2024-09-18

Trimethoprim / Sulfamethoxazole  
Fluconazole

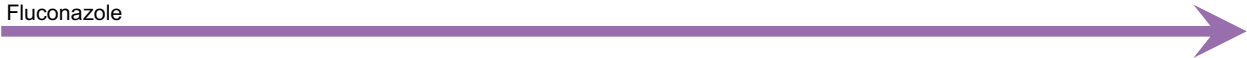

Human Immune Globulin  
Acyclovir

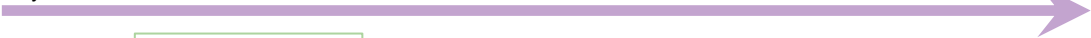

Azithromycin  
Cyclosporine

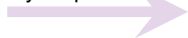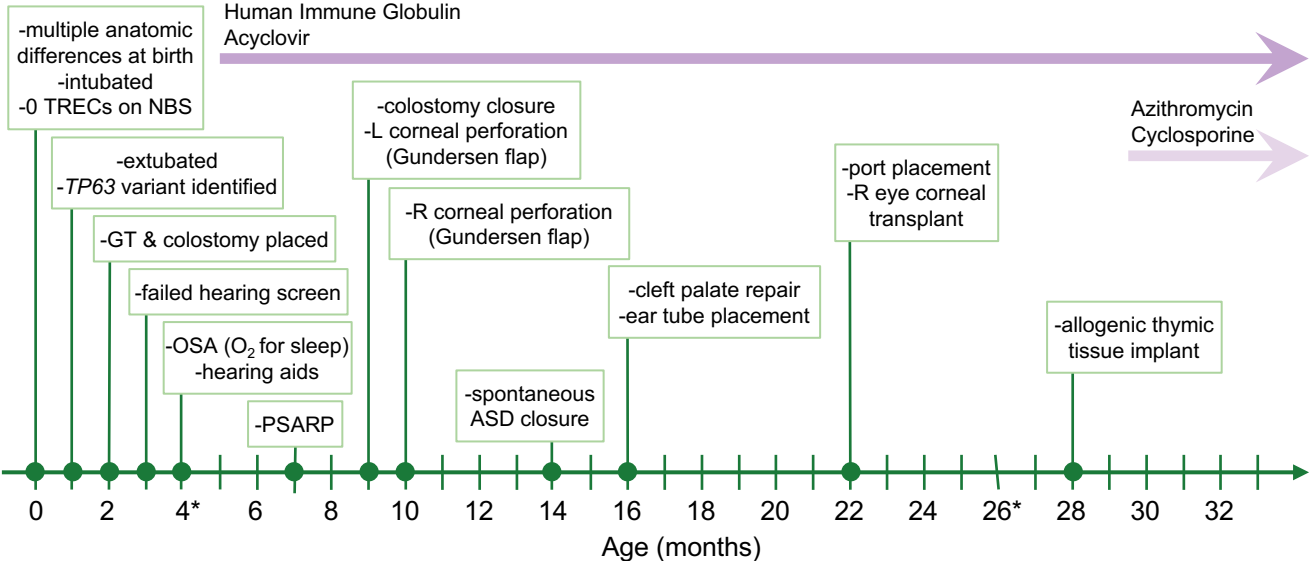

Supplement: DataSheet1.pdf [file DataSheet1.pdf]
